# Supplementary material for: Dabigatran activates inflammation resolution by promoting fibrinogen-like protein 2 shedding and RvD5n-3 DPA production
Source: PubMed Central journal article supplement (PMC7977467; doi:10.7150/thno.50182), 2021-02-20
Supplement: thnov11p4251s1.pdf [file thnov11p4251s1.pdf]

**Table S1.** Lipidome in exudates from zymosan-initiated peritonitis treated with N.S. (0.9% Natrii Chloride) (CON), warfarin (WAR, 200 µg/kg), dabigatran (DAB, 200 µg/kg), or heparin (HEP, 200 IU/mouse) for 4 and 48 hrs. Data are shown as mean ± SD (pg/exudate). ND, non-detected.

| Lipid Mediators<br>(pg/exudate) | 0 hr       | 4 hr         |               |              |                | 48 hr       |             |              |            |
|---------------------------------|------------|--------------|---------------|--------------|----------------|-------------|-------------|--------------|------------|
|                                 |            | CON          | WAR           | DAB          | HEP            | CON         | WAR         | DAB          | HEP        |
| <i>AA Metabolome</i>            |            |              |               |              |                |             |             |              |            |
| AA                              | 317±324    | 4210±1057    | 2440±743      | 4048±4936    | 20405±33552    | 76±40       | 285±323     | 364±594      | 97±74      |
| PGD <sub>2</sub>                | 2.17±2.06  | 3.76±1.26    | 3.02±0.46     | 2.45±1.18    | 126.83±226.45  | 1.73±0.97   | 0.73±0.45   | 1.73±0.85    | 2.06±1.67  |
| PGE <sub>2</sub>                | 1.48±0.21  | 9.17±1.45    | 0.68±0.21     | 1.54±0.34    | 4.75±0.55      | 2.73±0.87   | 0.81±0.24   | 1.85±0.22    | 1.70±1.11  |
| PGF2α                           | 0.57±1.04  | 1.28±1.18    | 1.51±0.45     | 1.34±0.73    | 22.78±40.70    | 0.05±0.09   | 0.08±0.17   | 0.24±0.41    | ND         |
| TXB <sub>2</sub>                | ND         | 0.32±0.24    | 1.31±0.61     | 1.01±0.81    | 37.94±81.32    | ND          | ND          | 0.20±0.33    | ND         |
| LTB <sub>4</sub>                | ND         | 62.68±33.18  | 1.44±0.48     | 2.53±0.59    | 5.94±1.32      | ND          | 0.69±0.10   | ND           | 0.44±0.15  |
| 5(6)-EET                        | 7.45±4.26  | 127.06±81.24 | 430.53±125.27 | 159.34±79.07 | 4713±9624      | 32.27±16.17 | 27.48±29.87 | 94.50±189.72 | 45.72±5.57 |
| 14(15)-EET                      | 22.20±1.10 | 30.74±3.33   | 100.06±26.09  | 35.49±18.83  | 1292±2718      | 6.74±4.37   | 2.11±1.69   | 18.68±36.52  | 10.06±4.50 |
| 5-HETE                          | 0.03±0.07  | 17.41±7.51   | 16.98±6.24    | 13.90±7.97   | 525.04±1047.74 | 0.51±0.60   | 0.31±0.68   | 2.32±5.08    | 0.95±0.76  |
| 11-HETE                         | 0.50±0.38  | 13.59±4.45   | 8.68±2.14     | 8.71±5.76    | 431.68±885.44  | 0.54±0.45   | 0.45±0.28   | 1.50±2.18    | 2.10±0.95  |

|                              |            |              |               |               |                |             |             |             |             |
|------------------------------|------------|--------------|---------------|---------------|----------------|-------------|-------------|-------------|-------------|
| 12-HETE                      | 31±26      | 1326±427     | 747±481       | 352±233       | 8282±15408     | 10±7        | 37±56       | 82±84       | 42±24       |
| 15-HETE                      | 11.06±6.22 | 151.24±53.90 | 679.04±187.37 | 173.74±96.90  | 6558±13996     | 44.86±35.59 | 10.71±9.08  | 140.9±281.4 | 63.86±39.64 |
| 5S,15S-DiHETE                | 0.01±0.03  | 49.61±15.68  | 51.29±13.93   | 43.59±28.08   | 780.93±1580.24 | 1.15±2.31   | 0.52±0.64   | 5.02±11.07  | 0.28±0.40   |
| 5,6-DHET                     | ND         | 9.44±1.63    | 2.12±1.20     | 4.41±4.33     | 35.85±45.41    | 0.14±0.13   | 0.94±1.32   | 2.71±4.57   | 2.02±1.04   |
| 8,9-DHET                     | 0.25±0.36  | 7.44±1.56    | 5.26±2.40     | 6.17±6.20     | 70.13±96.90    | 1.11±0.95   | 0.83±1.47   | 3.22±6.17   | 2.74±0.63   |
| 11,12-DHET                   | 0.39±0.15  | 19.76±2.84   | 12.77±5.15    | 16.67±18.57   | 136.38±210.45  | 2.35±1.57   | 2.59±2.83   | 9.31±16.58  | 7.62±3.01   |
| 14,15-DHET                   | 17.40±4.12 | 454.05±73.56 | 328.07±131.31 | 403.37±508.51 | 2667.6±4226.5  | 77.19±43.93 | 75.14±70.35 | 226.6±388.4 | 241.3±69.8  |
| 5S,6S-LXA4                   | 6.18±11.4  | 4.32±2.07    | 1.21±0.20     | 12.62±23.53   | 35.80±56.38    | 2.88±4.32   | 2.36±2.87   | 1.55±1.98   | 1.16±1.59   |
| 5S,6R-LXA4                   | 2.10±4.62  | 1.34±0.53    | 0.51±0.45     | 4.75±8.28     | 21.67±36.04    | 2.22±4.61   | 9.40±15.72  | 2.13±2.65   | 0.06±0.08   |
| 15(R)-LXA4                   | 5.18±11.45 | 4.99±9.10    | 1.48±0.97     | 4.86±6.19     | 182.51±394.55  | 0.31±0.70   | 7.96±16.80  | 0.95±2.13   | 0.04±0.06   |
| <b><i>DHA Metabolome</i></b> |            |              |               |               |                |             |             |             |             |
| DHA                          | 864±91     | 10802±2817   | 6231±1817     | 12863±1689    | 44340±7078     | 145±58      | 619±73      | 857±153     | 157±115     |
| 4-HDoHE                      | 0.19±0.02  | 3.63±1.07    | 1.15±0.12     | 3.37±0.47     | 167.07±331.25  | 0.24±0.04   | 1.80±0.32   | 0.20±0.03   | 0.31±0.03   |

|                 |            |              |              |                |                |             |             |             |             |
|-----------------|------------|--------------|--------------|----------------|----------------|-------------|-------------|-------------|-------------|
| 7-HDoHE         | 1.67±0.34  | 12.06±3.45   | 3.88±1.41    | 7.62±6.71      | 289.82±55.61   | 0.57±0.07   | 1.03±0.16   | 0.66±0.10   | 0.08±0.01   |
| 13-HDoHE        | 0.76±0.17  | 15.00±7.00   | 2.87±0.78    | 5.03±4.31      | 191.73±0.37    | 0.19±0.04   | 0.20±0.04   | 0.32±0.04   | 0.44±0.06   |
| 14S-HDoHE       | 88.3±182.8 | 849.6±330.2  | 205.7±160.0  | 115.1±81.6     | 1850.7±3422.7  | 0.9±0.7     | 2.7±0.3     | 2.1±2.0     | 3.0±0.2     |
| 16-HDoHE        | 0.61±0.11  | 60.88±24.70  | 14.07±9.98   | 9.28±6.42      | 365.93±72.91   | 0           | 0.01±0.00   | 1.42±2.15   | 0.24±0.34   |
| 17-HDoHE        | 10.02±7.38 | 302.97±81.23 | 104.56±20.31 | 120.82±1141.86 | 1413.4±3001.9  | 4.16±2.67   | 7.24±2.02   | 23.61±45.20 | 6.93±4.64   |
| 20-HDoHE        | 7.92±8.61  | 136.21±46.14 | 140.43±22.88 | 79.64±46.08    | 1682.64±360.93 | 6.28±4.92   | 7.30±6.07   | 25.90±51.87 | 7.38±5.12   |
| 10S,17S-DiHDoHE | 5.67±12.51 | 0.74±0.66    | 1.79±2.14    | 0.66±0.81      | 66.65±13.57    | 0.23±0.05   | 0.76±0.67   | 0.22±0.34   | 0           |
| PD1 (NPD1)      | 0.11±0.02  | 0.72±1.03    | 7.22±2.18    | 0.93±0.63      | 3.19±8.49      | 1.12±1.03   | 0.55±1.02   | 2.01±4.36   | 0.30±0.05   |
| 17R-RvD1        | 0.04±0.01  | 0.30±0.45    | 0.14±0.16    | 0.10±0.14      | 4.41±5.47      | 0.14±0.14   | 0.17±0.22   | 0.01±0.01   | 0.05±0.05   |
| RvD2            | 0.83±0.78  | 1.76±0.86    | 0.93±0.45    | 1.74±2.43      | 10.67±14.95    | 4.76±7.16   | 2.16±3.47   | 0.67±0.24   | 0.82±0.02   |
| RvD3            | 1.79±1.78  | 27.21±8.30   | 7.60±5.51    | 31.24±17.91    | 552.24±100.98  | 17.06±10.79 | 29.92±29.57 | 7.03±1.96   | 10.32±11.17 |
| RvD5            | 1.14±2.46  | 1.92±0.52    | 1.59±0.87    | 1.46±1.41      | 127.10±238.08  | 0.87±1.11   | 3.83±6.45   | 0.63±0.59   | 0.51±0.73   |
| MaR1            | 1.82±3.77  | 17.75±5.14   | 4.86±5.07    | 9.39±17.72     | 556.60±1083.79 | 2.01±3.63   | 6.60±6.91   | 0.28±0.43   | 1.54±2.17   |

| <b><i>EPA Metabolome</i></b> |            |             |              |             |               |             |             |             |             |
|------------------------------|------------|-------------|--------------|-------------|---------------|-------------|-------------|-------------|-------------|
| EPA                          | 1.89±2.46  | 74.46±18.67 | 69.56±15.08  | 71.18±57.32 | 439.78±823.91 | 2.53±1.92   | 8.67±10.65  | 9.71±17.31  | 2.65±1.59   |
| 5-HEPE                       | 0.13±0.29  | 1.97±0.79   | 1.91±1.07    | 2.26±1.74   | 67.53±117.01  | 0.57±0.62   | 0.92±1.23   | 0.49±0.63   | 0.69±0.98   |
| 8S-HEPE                      | 0.85±1.35  | 3.85±4.69   | 29.41±10.74  | 11.31±8.77  | 292.46±598.57 | 2.50±3.64   | 5.23±6.50   | 4.98±9.34   | 4.96±7.01   |
| 9S-HEPE                      | 0.12±0.27  | 10.75±2.99  | 46.61±14.98  | 15.29±9.09  | 457.08±960.10 | 2.85±2.23   | 1.53±1.06   | 9.97±21.44  | 3.70±2.30   |
| 12-HEPE                      | 0.37±0.37  | 31.55±10.38 | 18.95±11.07  | 9.88±6.39   | 222.21±411.09 | 1.02±2.04   | 1.11±1.81   | 1.71±2.47   | 0.75±1.06   |
| 15-HEPE                      | 50.5±20.2  | 725.9±286.7 | 2004.4±637.8 | 614.3±432.0 | 21447±45536   | 160.4±84.6  | 145.5±149.9 | 383.3±741.8 | 163.3±3.0   |
| 18-HEPE                      | 13.01±8.15 | 17.87±9.43  | 48.55±13.72  | 16.90±12.28 | 414.28±755.94 | 34.43±39.16 | 36.03±48.59 | 10.09±15.70 | 16.67±10.65 |
| RvE1                         | 6.07±4.71  | 18.70±17.97 | 15.10±3.11   | 19.74±11.84 | 142.29±262.87 | 17.72±5.96  | 27.59±38.33 | 6.84±3.19   | 4.33±0.49   |
| PGD3                         | 1.54±1.88  | 1.22±0.65   | 2.32±0.90    | 1.07±1.10   | 19.53±36.28   | 2.33±3.89   | 2.07±1.43   | 1.83±1.76   | 50.92±69.76 |
| <b><i>DPA Metabolome</i></b> |            |             |              |             |               |             |             |             |             |
| DPA                          | 44.1±45.9  | 336.0±119.2 | 277.5±104.7  | 582.3±842.6 | 1569.7±2464.1 | 12.0±5.8    | 34.6±53.2   | 37.3±65.6   | 9.0±4.6     |
| 17-ketoDPA                   | 2.53±3.06  | 63.13±12.36 | 13.72±3.08   | 22.36±29.42 | 112.90±202.80 | 1.70±0.87   | 5.61±5.63   | 4.38±5.87   | 3.80±4.62   |
| RvDp5                        | 3.42±0.86  | 8.23±1.69   | 28.92±9.79   | 8.93±0.76   | 7.97±0.32     | 0.99±0.45   | 0.13±0.03   | 4.00±0.53   | 0.21±0.08   |
